# Supplementary material for: Lewy body dementia: Overcoming barriers and identifying solutions
Source: PubMed Central journal article supplement — Alzheimers Dement. 2024 Jan 24;20(3):2298–308. doi: 10.1002/alz.13674 (PMC10942666; doi:10.1002/alz.13674), 2024-01-24
Supplement: NIHMS1969108-supplement-Supplemental_Figures_1-4.pdf [file NIHMS1969108-supplement-Supplemental_Figures_1-4.pdf]

## Supplemental Figures

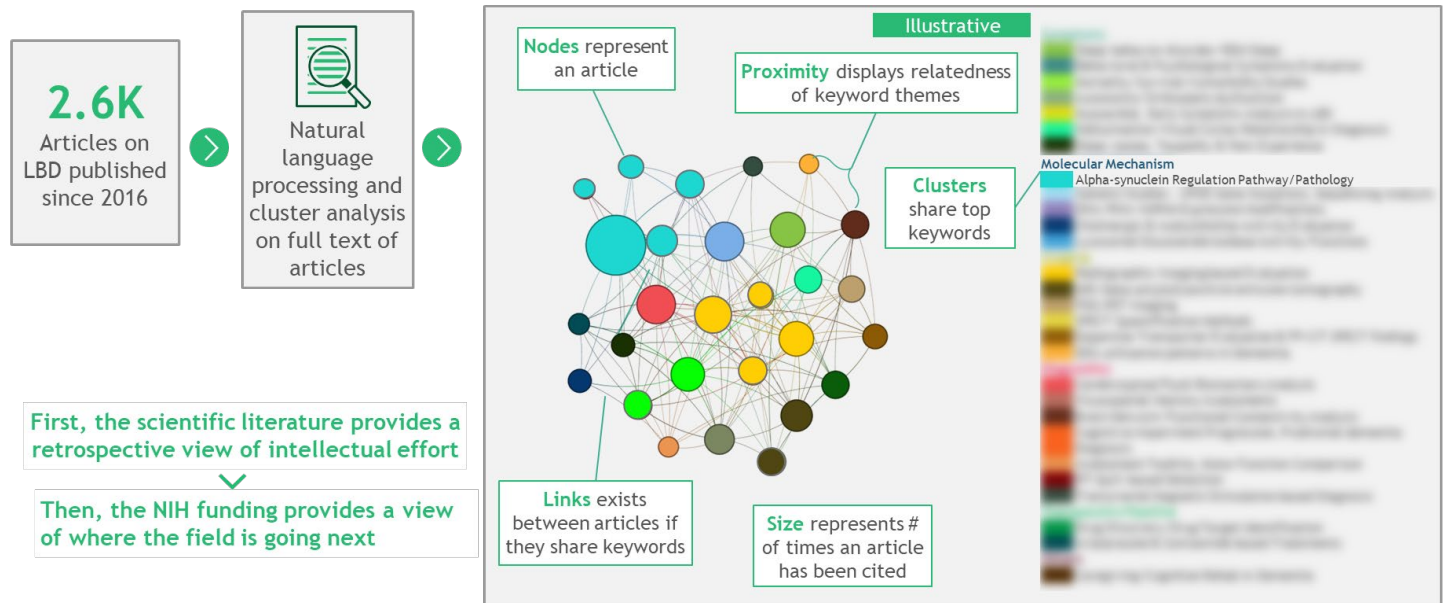

Supplemental Figure 1: Schematic of natural language processing analysis for publications.

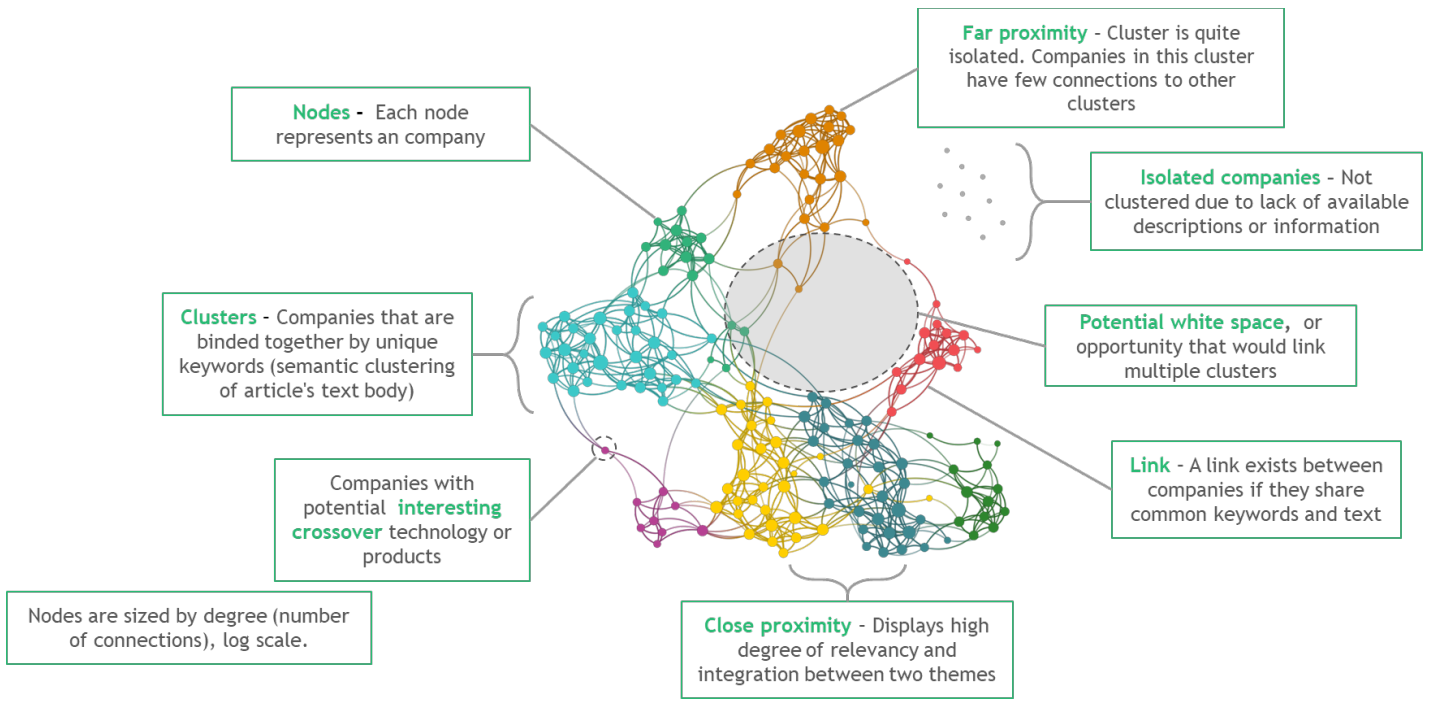

**Supplemental Figure 2: How to read a Quid network.**

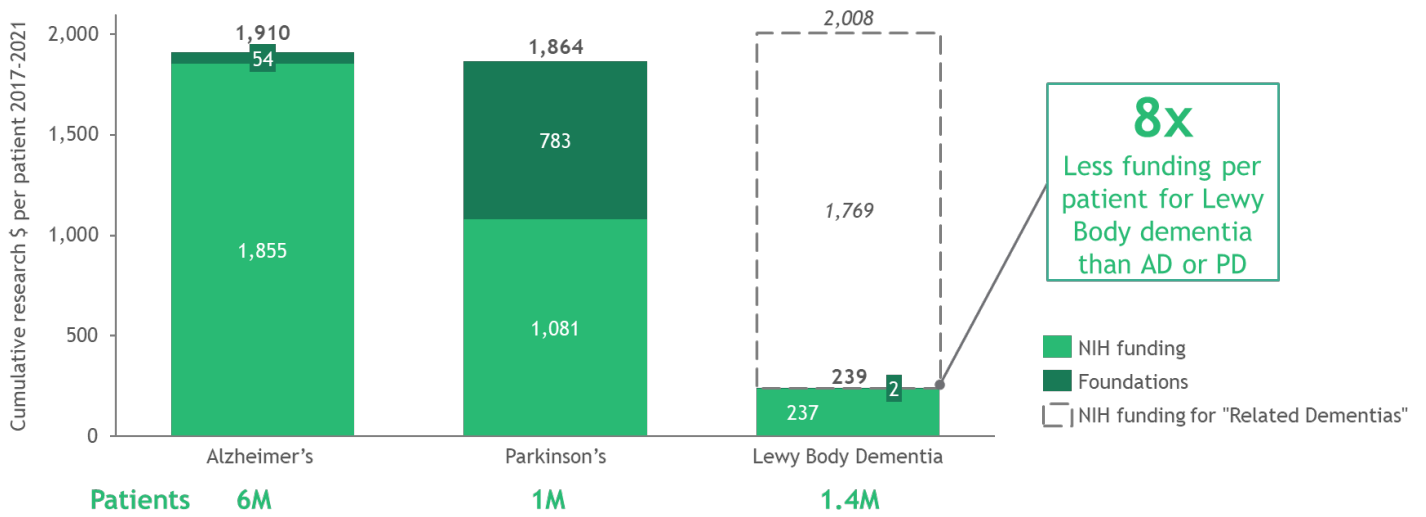

**Supplemental Figure 3: Funding for AD, PD, and LBD.** Cumulative funding from NIH and foundations.

Source: NIH Research Portfolio Online Reporting Tools reports from May 16, 2022 and publicly available 990 filings and annual reports.

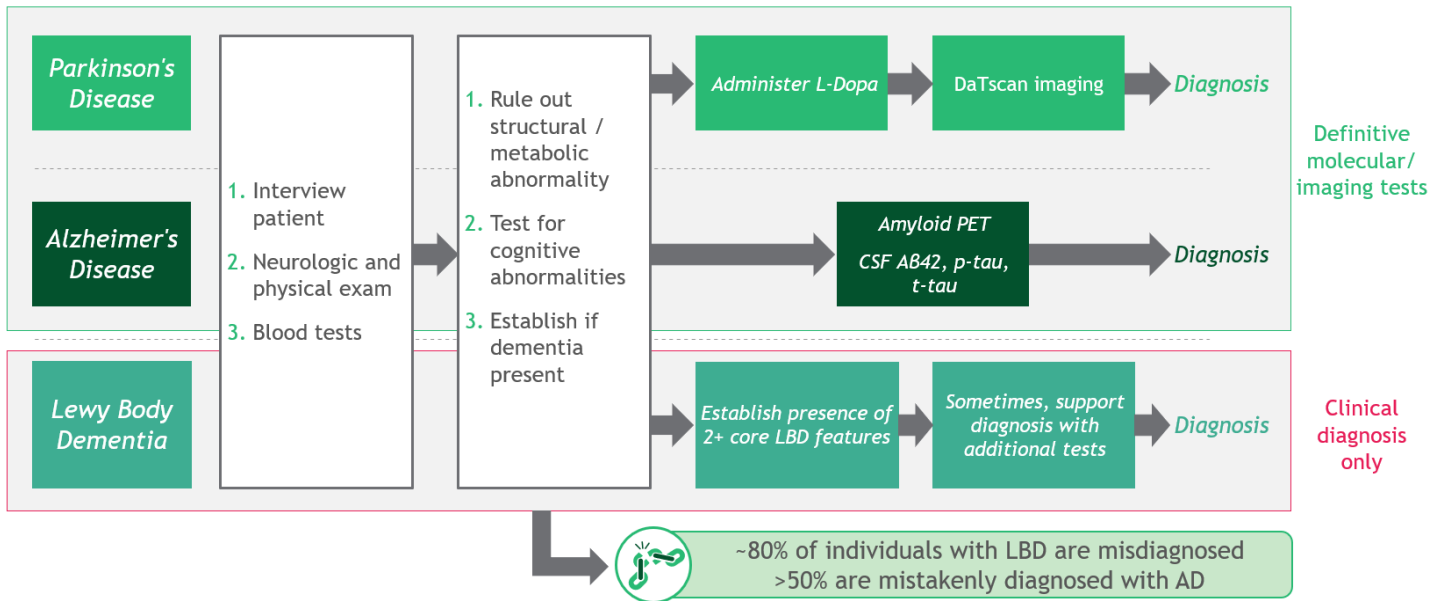

**Supplemental Figure 4: Current diagnostic methods for PD, AD, and LBD.**
